# Supplementary material for: The effect of gallic acid on the copper(ii) complex ofN-(methylpyridin-2-yl)-amidino-O-methylurea: crystal structure, DNA interactions,in vitrocytotoxicity and antibacterial activity
Source: Royal Society of Chemistry journal article supplement (doi:10.1039/d3nj00446e), 2023-01-01
Supplement: d3nj00446e1.pdf [file d3nj00446e1.pdf]

## Supplementary information

### **The effect of gallic acid on copper(II) complex of *N*-(methylpyridin-2-yl)-amidino-*O*-methylurea: Crystal structure, DNA interactions, *in vitro* cytotoxicity and antibacterial activity**

Prangtip Nonkuntod,<sup>a</sup> Jaurusup Boonmak,<sup>a</sup> Thanaset Senawong,<sup>b</sup> Chaiyaporn Soikum,<sup>c</sup> Prapansak Chaveerach,<sup>c</sup> Athis Watwiangkham,<sup>d</sup> Suwit Suthirakun,<sup>d</sup> Unchulee Chaveerach<sup>\*a</sup>

<sup>a</sup> *Materials Chemistry Research Centre, Department of Chemistry and Centre of Excellence for Innovation in Chemistry, Faculty of Science, Khon Kaen University, Khon Kaen, 40002, Thailand, e-mail: sunchul@kku.ac.th*

<sup>b</sup> *Department of Biochemistry, Faculty of Science, Khon Kaen University, Khon Kaen 40002, Thailand*

<sup>c</sup> *Department of Veterinary Public Health, Faculty of Veterinary Medicine, Khon Kaen University, Khon Kaen 40002, Thailand*

<sup>d</sup> *School of Chemistry, Institute of Science, Suranaree University of Technology, Nakhon Ratchasima 30000, Thailand*

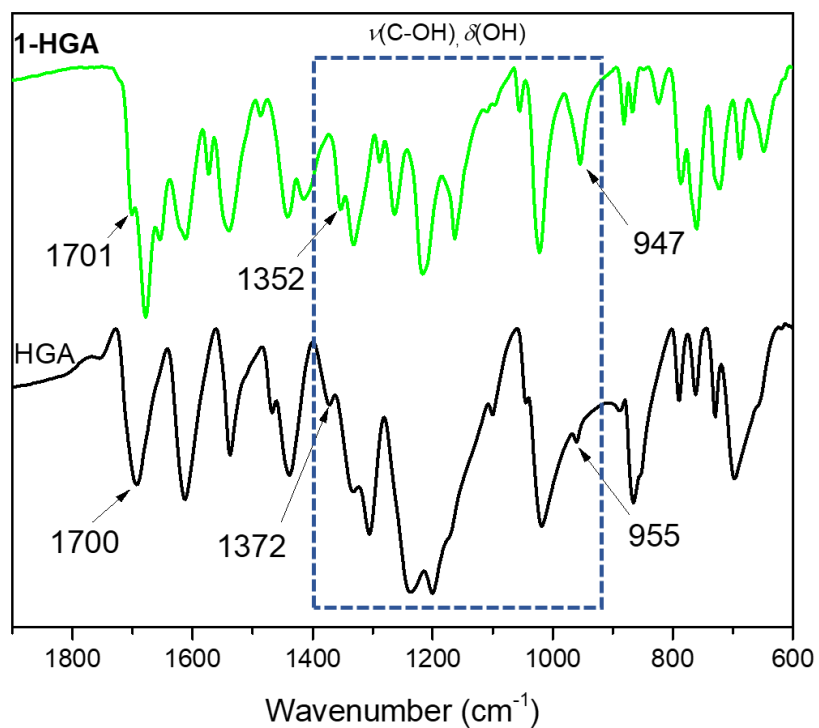

**Fig. S1** Overlaid IR spectra of **1-HGA** and gallic acid (HGA) in the region of 2000 – 600  $\text{cm}^{-1}$ .

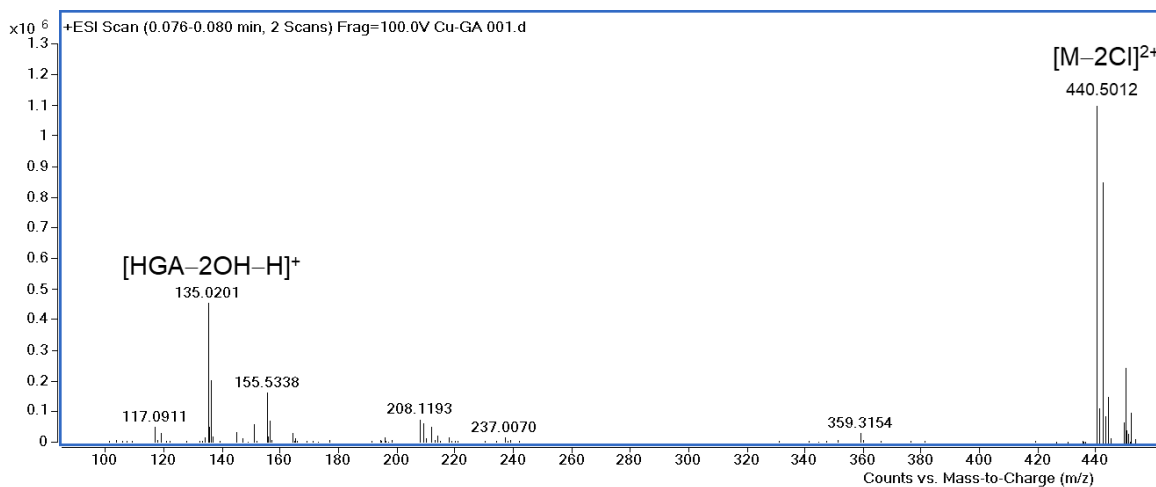

**Fig. S2** Mass spectra of **1-HGA** in water : methanol (1 : 3 v/v) solution.

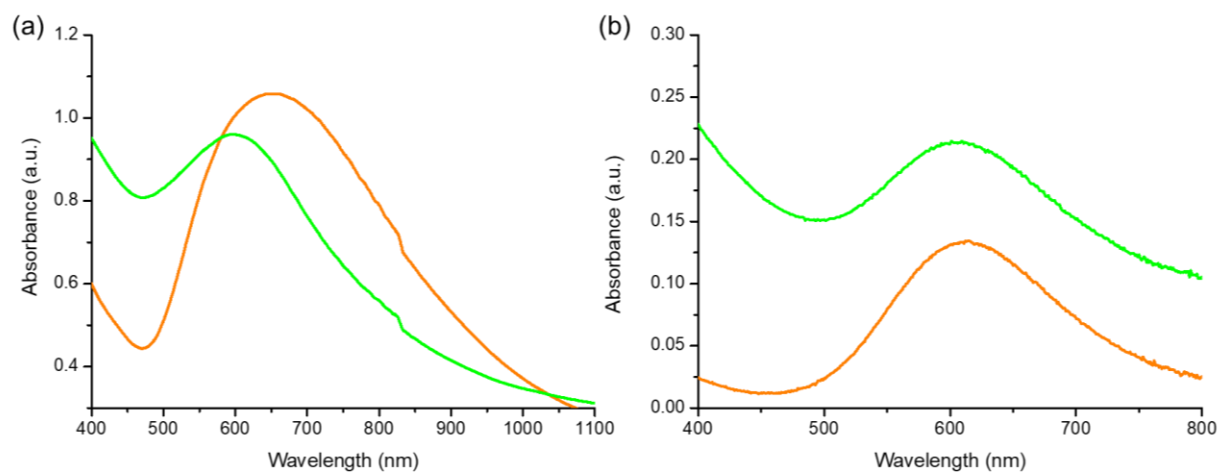

**Fig. S3** (a) Diffuse reflectance and (b) UV-Vis spectra of **1** (orange line) and **1-HGA** (green line) in Tris-buffer at pH 7.2.

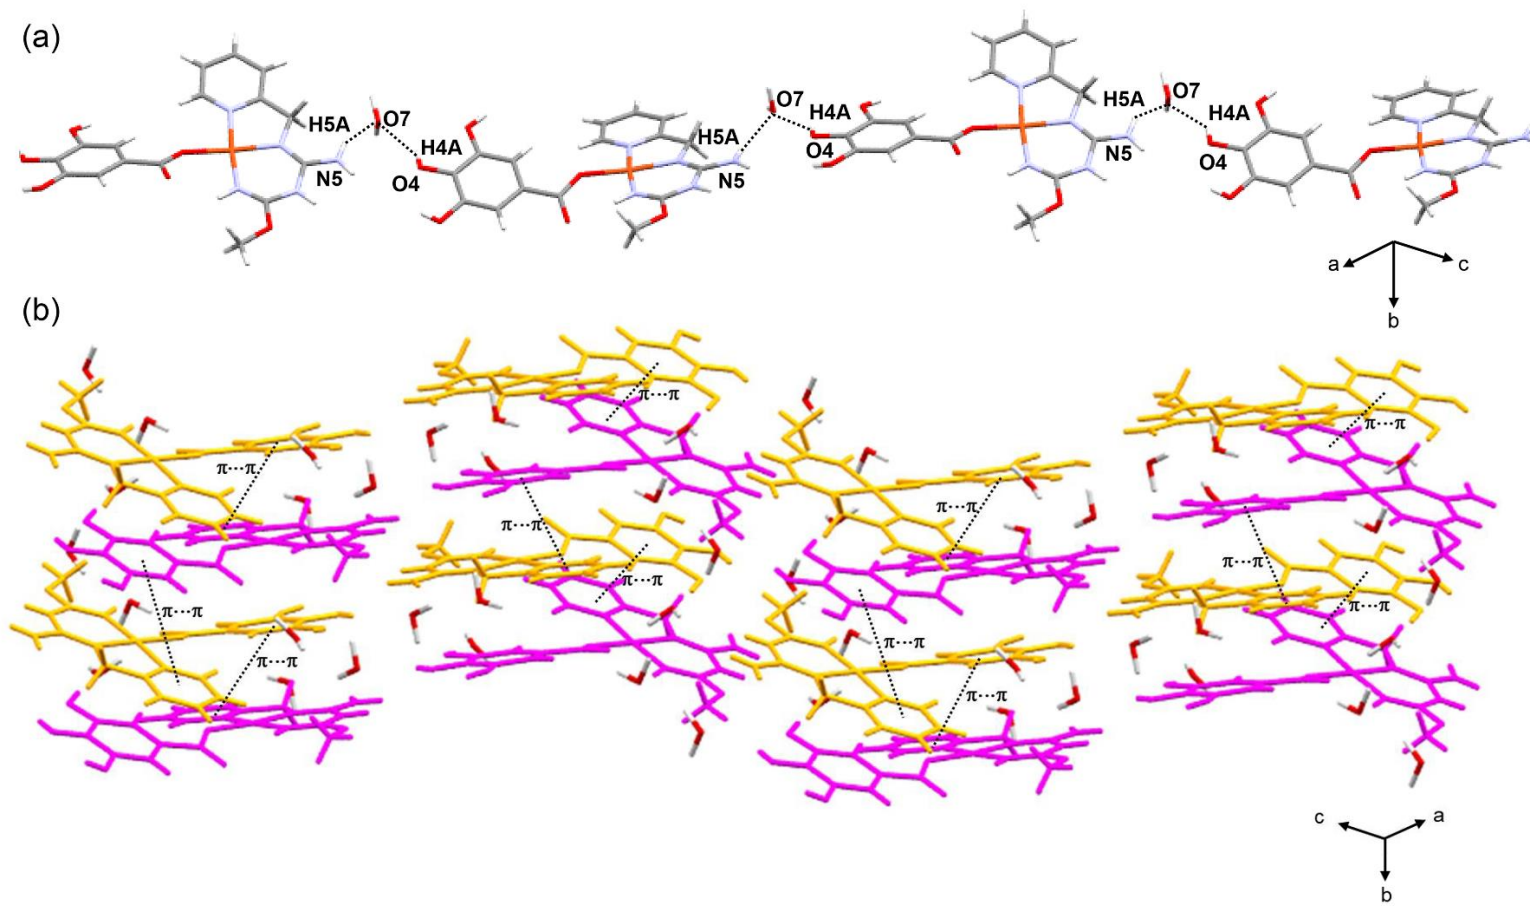

**Fig. S4** (a) 1D structure of hydrogen bonds (dashed lines) of lattice water (O7), amide hydrogen atom from L<sup>3m</sup> (H5A) and phenol hydrogen atom from GA (H4A) and (b)  $\pi\cdots\pi$  interactions between the central phenol ring of GA and the pyridyl ring of L<sup>3m</sup>.



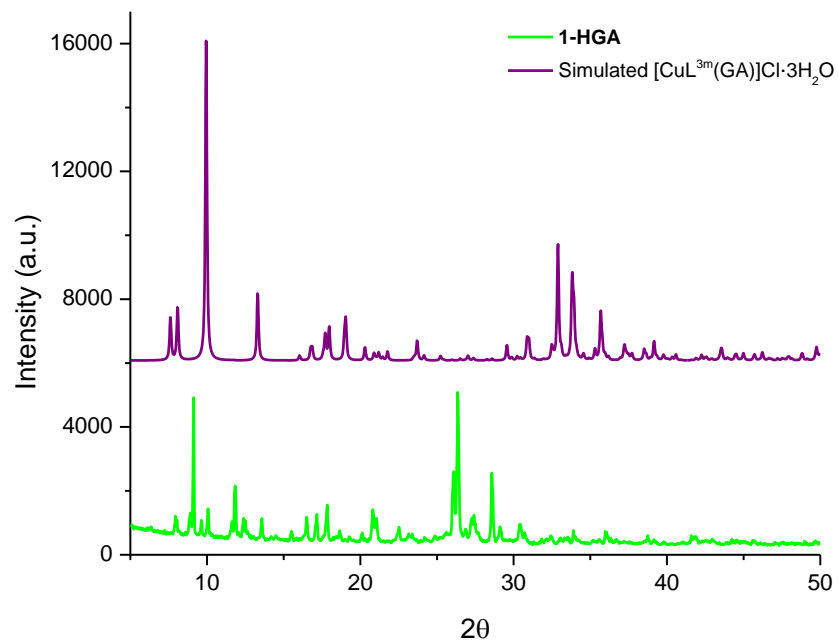

**Fig. S7** PXRD patterns of simulated  $[\text{CuL}^{3\text{m}}(\text{GA})]\text{Cl}\cdot 3\text{H}_2\text{O}$  from the single crystal data and **1-HGA**.

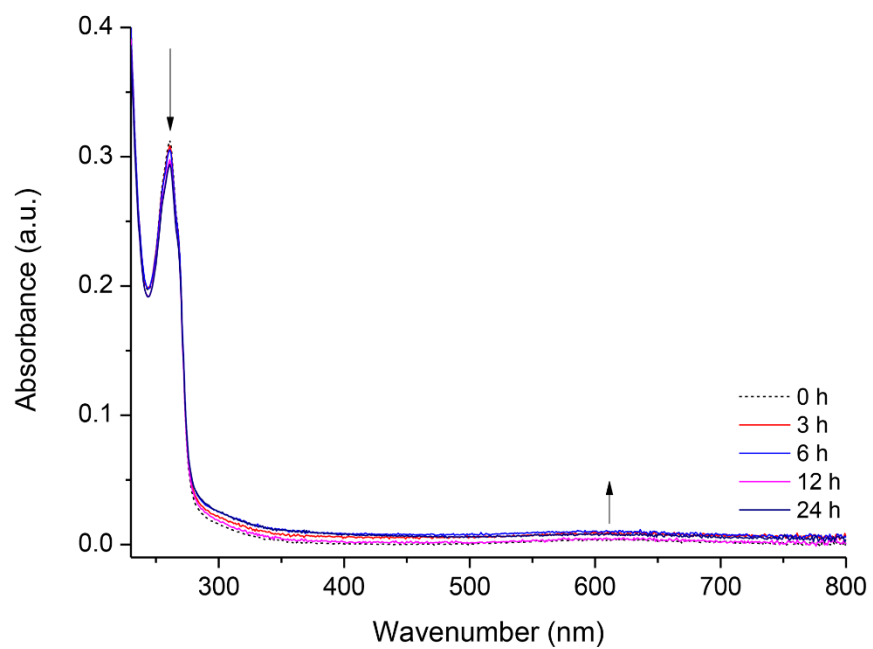

**Fig. S8** UV-Vis spectra of **1-HGA** (50  $\mu\text{M}$ ) in Tris-buffer at pH 7.2 at 0, 3, 6, 12 and 24 h.

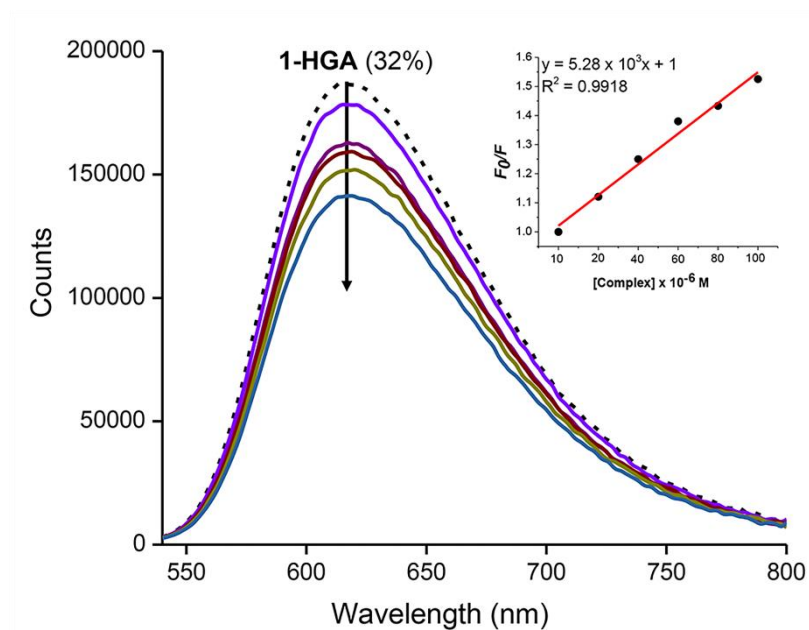

**Fig. S9** Emission spectra of EB–DNA (100:50  $\mu\text{M}$ ) in the presence of **1-HGA** with the  $[\text{Complex}]/[\text{DNA}]$  ratios of 0.00, 0.20, 0.40, 0.60, 0.80 and 1.00 in Tris-buffer at pH 7.2 for 30 min. Insets: Plots of  $F_0/F$  vs.  $[\text{Complex}]$ .

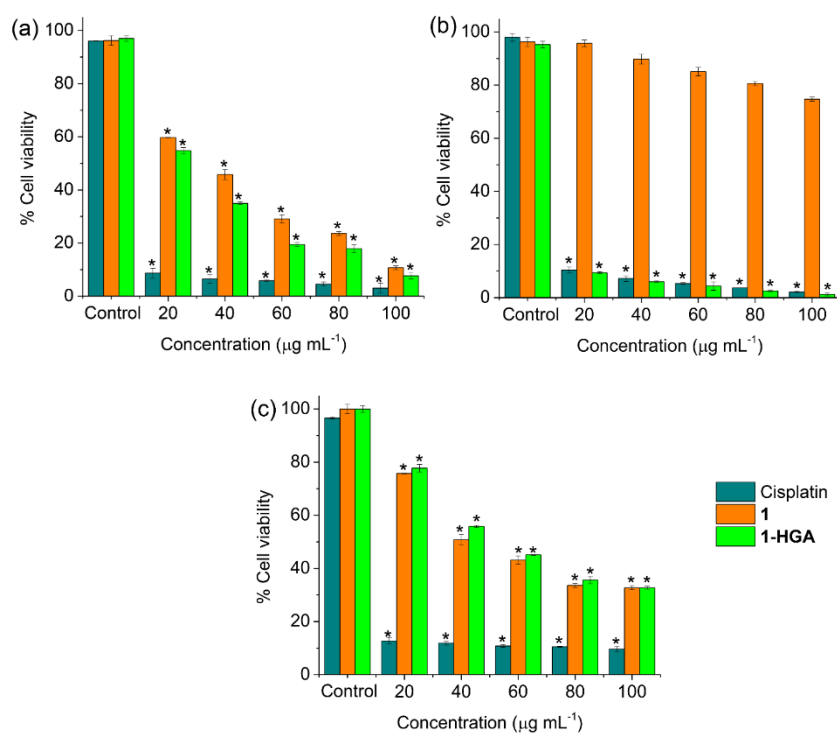

**Fig. S10** Cytotoxicity profiles of **1** and **1-HGA** (0 - 100  $\mu\text{M}$ ) for (a) HeLa, (b) MCF-7 and (c) Vero cell lines. Data are reported as the mean  $\pm$  SD for  $n = 3$  and  $*P < 0.01$  compared to control.

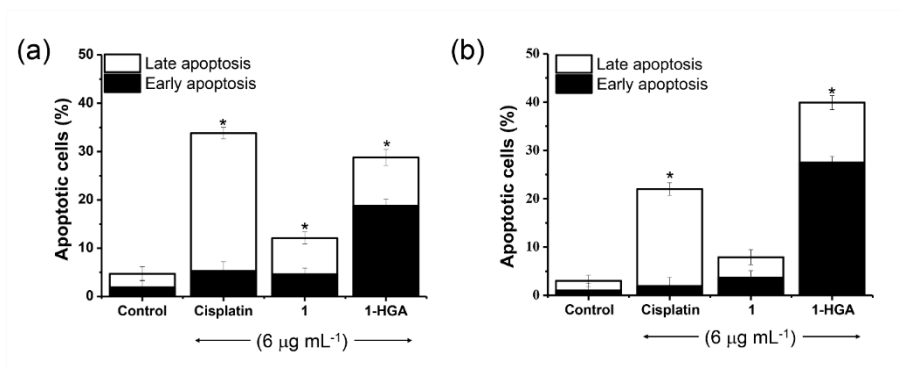

**Fig. S11** Percentages of apoptotic cells for (a) HeLa and (b) MCF-7 cell lines. Tris-buffer at pH 7.2 and cisplatin treatment was used as negative and positive controls. Results are the mean  $\pm$  SD,  $n = 3$ . \* $P < 0.01$  indicates a significant difference between the treatment and solvent control.

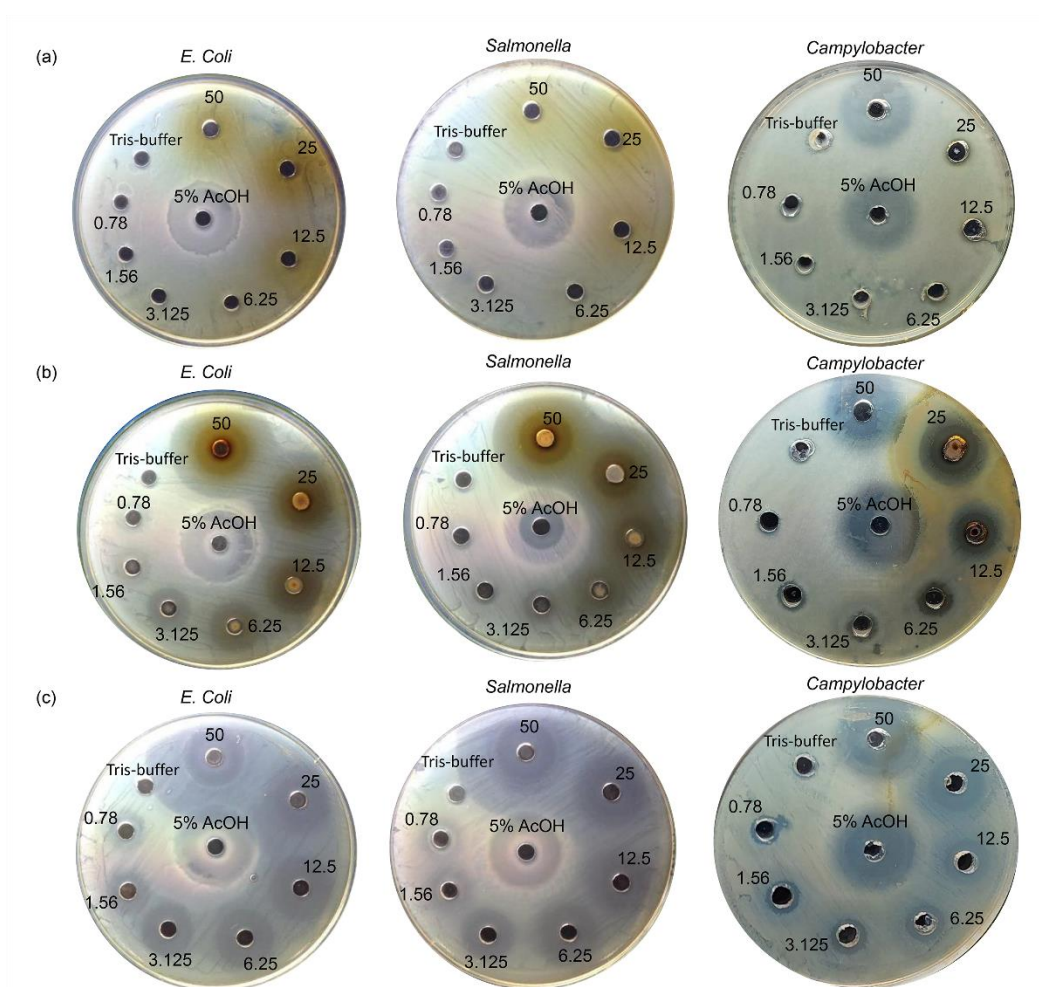

**Fig. S12** Antibacterial activity of (a) gallic acid (HGA), (b)  $[\text{CuL}^{\text{3m}}\text{Cl}_2]$  (**1**) and (c)  $[\text{CuL}^{\text{3m}}(\text{HGA})\text{Cl}_2]$  (**1-HGA**) in the concentration range of 50 - 0.78  $\mu\text{g mL}^{-1}$  against *E. Coli*, *Salmonella* and *Campylobacter* by disc diffusion method.



**Table S1.** Assignment of infrared vibrational modes for **1**, **1-HGA** and gallic acid (HGA)

| Compound     | $\nu(\text{OH})$ ,<br>$\nu(\text{NH})$ | $\nu_s(\text{C=O})$ | $\nu_{as}(\text{NH})$ ,<br>$\delta(\text{NH})$ | $\nu(\text{C=C})$ ,<br>$\nu(\text{C-C})$ | $\nu(\text{C-O})$ ,<br>$\nu(\text{C-OH})$ ,<br>$\delta(\text{OH})$ | $\delta(\text{OH})$ | $\gamma(\text{OH})$ | $\delta(\text{C=O})$ ,<br>$\gamma(\text{CO})$ |
|--------------|----------------------------------------|---------------------|------------------------------------------------|------------------------------------------|--------------------------------------------------------------------|---------------------|---------------------|-----------------------------------------------|
| <b>1</b>     | 3512                                   |                     | 1681                                           | 1614                                     | 1377                                                               |                     |                     |                                               |
|              | 3360                                   |                     | 1642                                           | 1573                                     | 1341                                                               |                     |                     |                                               |
|              | 3284                                   |                     |                                                | 1485                                     |                                                                    |                     |                     |                                               |
|              | 3141                                   |                     |                                                |                                          |                                                                    |                     |                     |                                               |
| <b>1-HGA</b> | 3443                                   | 1701                | 1678                                           | 1612                                     | 1352                                                               | 1263                | 881                 | 688                                           |
|              | 3395                                   |                     |                                                | 1573                                     | 1331                                                               | 1217                | 867                 |                                               |
|              | 3231                                   |                     |                                                | 1539                                     |                                                                    | 1163                | 729                 |                                               |
|              | 3076                                   |                     |                                                | 1487                                     |                                                                    | 1022                |                     |                                               |
|              | 2988                                   |                     |                                                | 1442                                     |                                                                    | 947                 |                     |                                               |
| HGA          | 3485                                   | 1700                |                                                | 1613                                     | 1372                                                               | 1237                | 888                 | 697                                           |
|              | 3265                                   |                     |                                                | 1538                                     | 1332                                                               | 1018                | 789                 |                                               |
|              | 2646                                   |                     |                                                | 1438                                     |                                                                    | 955                 | 730                 |                                               |

Abbreviation:  $\nu_{as}$ , asymmetric stretching;  $\nu_s$ , symmetric stretching;  $\delta$ , bending;  $\gamma$ , out-of-plane bending.

**Table S2.** Selected bond lengths (Å) and angles (°) for  $[\text{CuL}^{3m}(\text{GA})]\text{Cl}\cdot 3\text{H}_2\text{O}$ 

|        | Bond lengths (Å) |           | Bond angles (°) |  |
|--------|------------------|-----------|-----------------|--|
| Cu1–N1 | 1.973(2)         | N1–Cu1–N2 | 82.89(10)       |  |
| Cu1–N2 | 1.947(2)         | N1–Cu1–N4 | 174.04(9)       |  |
| Cu1–N4 | 1.920(2)         | N2–Cu1–N4 | 91.18(10)       |  |
| Cu1–O1 | 1.931(19)        | O1–Cu1–N1 | 90.62(9)        |  |
|        |                  | O1–Cu1–N2 | 179.98(9)       |  |
|        |                  | O1–Cu1–N4 | 95.33(9)        |  |

**Table S3.** Hydrogen bond lengths (Å) and angles (°) for [CuL<sup>3m</sup>(GA)]Cl·3H<sub>2</sub>O

| D—H...A     | D—H/Å     | H...A/Å | D...A/Å  | D—H...A/Å | symmetry            |
|-------------|-----------|---------|----------|-----------|---------------------|
| O4—H4A...O7 | 0.71(3)   | 2.24(3) | 2.848(4) | 144(4)    |                     |
| O5—H5...O8  | 0.84(4)   | 1.86(4) | 2.895(3) | 175(4)    |                     |
| N5—H5A...O7 | 0.86      | 2.22    | 3.017(5) | 153       | -1/2+x,1/2-y,1/2+z  |
| O7—H7B...O9 | 0.96(3)   | 0.96(3) | 3.010(6) | 160(2)    | -1/2+x,1/2-y,-1/2+z |
| O8—H8B...O2 | 0.958(13) | 0.96(2) | 2.809(3) | 174(2)    | 1/2-x,-1/2+y,3/2-z  |
